# Supplementary material for: Integrin alpha-2 and beta-1 expression increases through multiple generations of the EDW01 patient-derived xenograft model of breast cancer—insight into their role in epithelial mesenchymal transition in vivo gained from an in vitro model system
Source: Springer Nature journal article supplement (doi:10.1186/s13058-020-01366-8), 2020-12-01

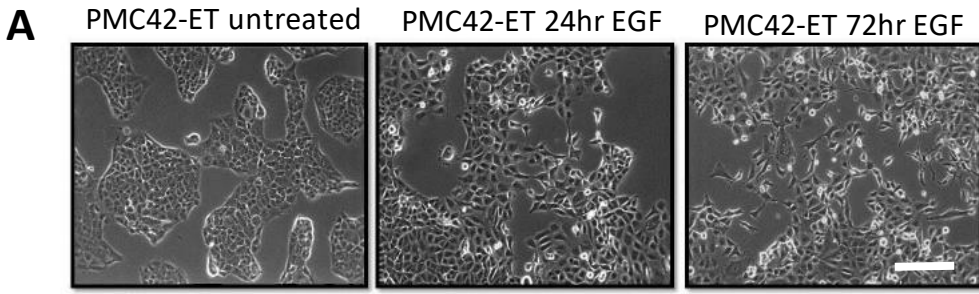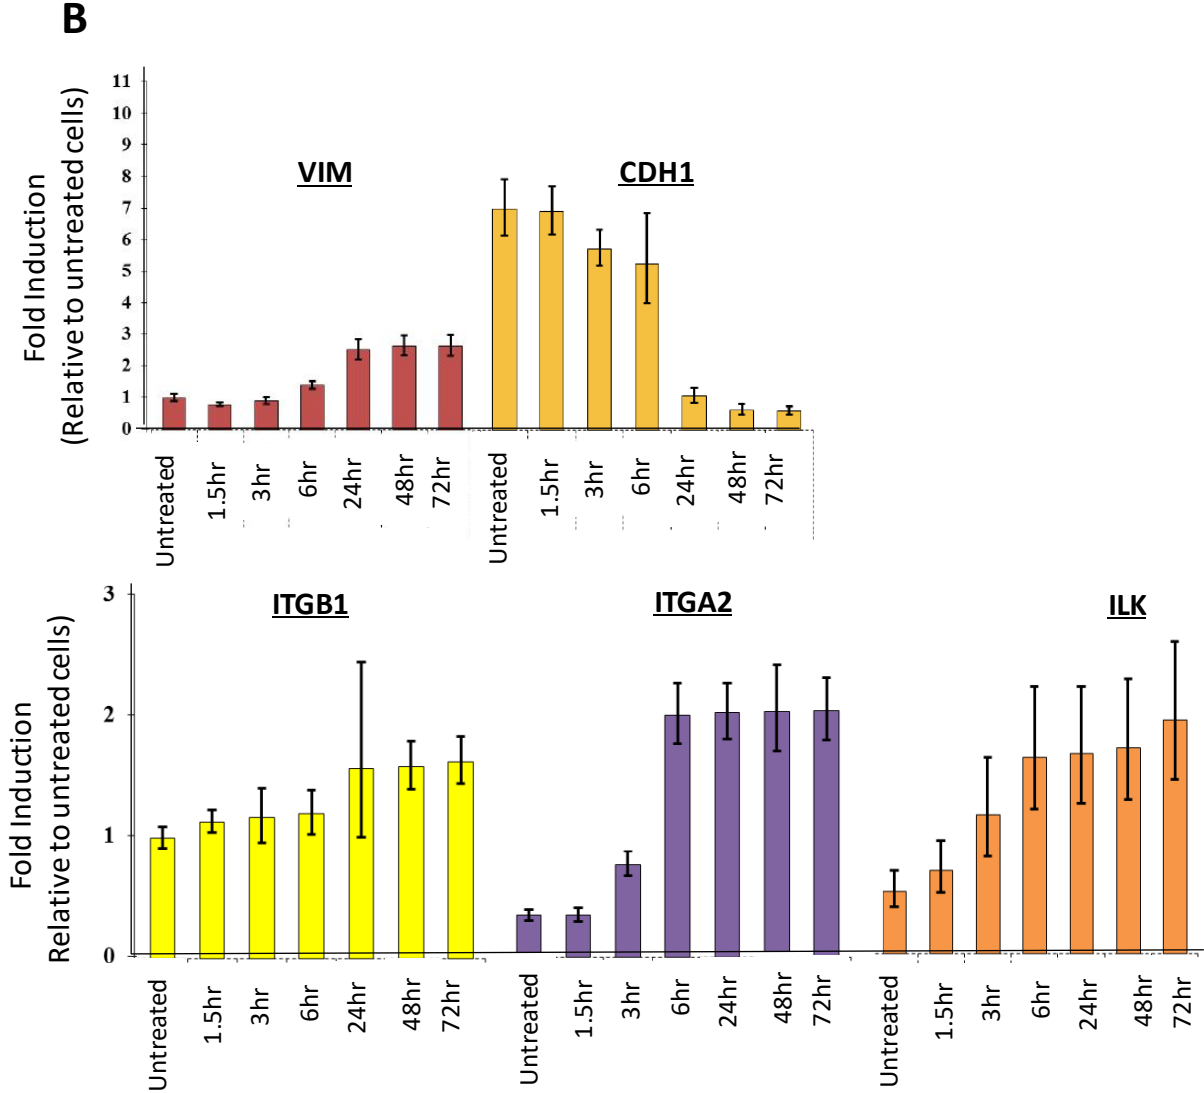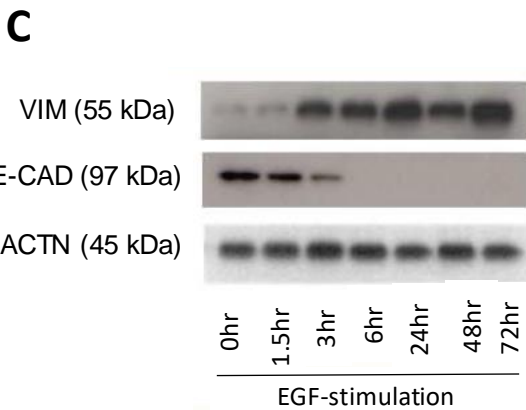

Supplement: MOESM6 [file 18657632]
